# Supplementary material for: Phytochemistry and Biological Studies of Endemic Hawaiian Plants
Source: MDPI journal article supplement (doi:10.3390/ijms242216323), 2023-11-14
Supplement: s1 [file s1]

# Phytochemistry and biological studies of the endemic Hawaiian plants

Pornphimon Meesakul <sup>1</sup>, Tyler Shea <sup>2</sup>, Roland Fenstemacher <sup>3</sup>, Shi Xuan Wong <sup>4</sup>, Yutaka Kuroki <sup>4</sup>, Aya Wada <sup>4</sup>, Shugeng Cao <sup>1,\*</sup>

<sup>1</sup> Department of Pharmaceutical Sciences, Daniel K. Inouye College of Pharmacy, University of Hawai'i at Hilo, 200 W. Kawili St., Hilo, HI 96720, USA; pmeesak@hawaii.edu

<sup>2</sup> Chemistry Department, University of Hawai'i at Hilo, 200 W. Kawili St., Hilo, HI 96720, USA; tylerms3@hawaii.edu

<sup>3</sup> Chemistry Laboratory, Board of Water Supply, City and County of Honolulu, 630 South Beretania Street, Honolulu, HI 96843, USA; hale\_noa@yahoo.com

<sup>4</sup> Delightex Pte. Ltd., 230 Victoria Street, #15-01/08 Bugis Junction Towers, Singapore 188024, Singapore; shixuan@delightexplorers.com (S.X.W.); yutaka@delightexplorers.com (Y.K.); aya@delightexplorers.com (A.W.)

\* Correspondence: scao@hawaii.edu

**Table S1.** The list of endemic Hawaiian plants has been reported.

| No. | Benjamin C. Stone in 1967 [5]                                                                                     | Hawaiian Ethnobotany online database (Bishop Museum, 2023) [7] | The Hawaiian Islands website, National Museum of Natural History (NMNH) [6] | All endemic Hawaiian plants [5–7]                      |
|-----|-------------------------------------------------------------------------------------------------------------------|----------------------------------------------------------------|-----------------------------------------------------------------------------|--------------------------------------------------------|
| 1   | <i>Bidens cosmoides</i>                                                                                           | <i>Bidens amplexens</i>                                        | <i>Argemone glauca</i> var. <i>glauca</i>                                   | <i>Argemone glauca</i> var. <i>glauca</i>              |
| 2   | <i>Charpentiera obovata</i>                                                                                       | <i>Bidens asymmetrica</i>                                      | <i>Bidens amplexens</i>                                                     | <i>Bidens amplexens</i>                                |
| 3   | <i>Hillebrandia sandwicensis</i>                                                                                  | <i>Bidens campylotheca</i>                                     | <i>Bidens asymmetrica</i>                                                   | <i>Bidens asymmetrica</i>                              |
| 4   | <i>Platydesma campanulatum</i> , <i>P. spathulatum</i> , <i>P. campanulata</i> (syn. <i>Melicope spathulata</i> ) | <i>Bidens cervicata</i>                                        | <i>Bidens campylotheca</i> subsp. <i>campylotheca</i>                       | <i>Bidens campylotheca</i>                             |
| 5   |                                                                                                                   | <i>Bidens conjuncta</i>                                        | <i>Bidens campylotheca</i> subsp. <i>pentamera</i>                          | <i>Bidens campylotheca</i> subsp. <i>campylotheca</i>  |
| 6   |                                                                                                                   | <i>Bidens cosmoides</i>                                        | <i>Bidens campylotheca</i> subsp. <i>waihoiensis</i>                        | <i>Bidens campylotheca</i> subsp. <i>pentamera</i>     |
| 7   |                                                                                                                   | <i>Bidens forbesii</i>                                         | <i>Bidens cervicata</i>                                                     | <i>Bidens campylotheca</i> subsp. <i>waihoiensis</i>   |
| 8   |                                                                                                                   | <i>Bidens hawaiiensis</i>                                      | <i>Bidens conjuncta</i>                                                     | <i>Bidens cervicata</i>                                |
| 9   |                                                                                                                   | <i>Bidens hillebrandiana</i>                                   | <i>Bidens cosmoides</i>                                                     | <i>Bidens conjuncta</i>                                |
| 10  |                                                                                                                   | <i>Bidens macrocarpa</i>                                       | <i>Bidens forbesii</i> subsp. <i>forbesii</i>                               | <i>Bidens cosmoides</i>                                |
| 11  |                                                                                                                   | <i>Bidens mauiensis</i>                                        | <i>Bidens forbesii</i> subsp. <i>kahiliensis</i>                            | <i>Bidens forbesii</i>                                 |
| 12  |                                                                                                                   | <i>Bidens menziesii</i>                                        | <i>Bidens hawaiiensis</i>                                                   | <i>Bidens forbesii</i> subsp. <i>forbesii</i>          |
| 13  |                                                                                                                   | <i>Bidens micrantha</i>                                        | <i>Bidens hillebrandiana</i> subsp. <i>polycephala</i>                      | <i>Bidens forbesii</i> subsp. <i>kahiliensis</i>       |
| 14  |                                                                                                                   | <i>Bidens molokaiensis</i>                                     | <i>Bidens macrocarpa</i>                                                    | <i>Bidens hawaiiensis</i>                              |
| 15  |                                                                                                                   | <i>Bidens populifolia</i>                                      | <i>Bidens mauiensis</i>                                                     | <i>Bidens hillebrandiana</i>                           |
| 16  |                                                                                                                   | <i>Bidens sandwicensis</i>                                     | <i>Bidens menziesii</i> subsp. <i>filiformis</i>                            | <i>Bidens hillebrandiana</i> subsp. <i>polycephala</i> |
| 17  |                                                                                                                   | <i>Bidens torta</i>                                            | <i>Bidens menziesii</i> subsp. <i>menziesii</i>                             | <i>Bidens macrocarpa</i>                               |
| 18  |                                                                                                                   | <i>Bidens valida</i>                                           | <i>Bidens micrantha</i> subsp. <i>ctenophylla</i>                           | <i>Bidens mauiensis</i>                                |
| 19  |                                                                                                                   | <i>Bidens wiebkei</i>                                          | <i>Bidens micrantha</i> subsp. <i>kalealaha</i>                             | <i>Bidens menziesii</i>                                |
| 20  |                                                                                                                   | <i>Charpentiera obovata</i>                                    | <i>Bidens micrantha</i> subsp. <i>micrantha</i>                             | <i>Bidens menziesii</i> subsp. <i>filiformis</i>       |
| 21  |                                                                                                                   | <i>Clermontia persicifolia</i>                                 | <i>Bidens molokaiensis</i>                                                  | <i>Bidens menziesii</i> subsp. <i>menziesii</i>        |
| 22  |                                                                                                                   | <i>Cuscuta sandwichiana</i>                                    | <i>Bidens populifolia</i>                                                   | <i>Bidens micrantha</i>                                |
| 23  |                                                                                                                   | <i>Dubautia arborea</i>                                        | <i>Bidens sandwicensis</i> subsp. <i>confusa</i>                            | <i>Bidens micrantha</i> subsp. <i>ctenophylla</i>      |
| 24  |                                                                                                                   | <i>Gardenia brighamii</i>                                      | <i>Bidens sandwicensis</i> subsp. <i>sandwicensis</i>                       | <i>Bidens micrantha</i> subsp. <i>kalealaha</i>        |
| 25  |                                                                                                                   | <i>Melicope barbigera</i> (syn. <i>Pelea barbigera</i> )       | <i>Bidens torta</i>                                                         | <i>Bidens micrantha</i> subsp. <i>micrantha</i>        |
| 26  |                                                                                                                   | <i>Pipturus albidus</i>                                        | <i>Bidens valida</i>                                                        | <i>Bidens molokaiensis</i>                             |

| No. | Benjamin C. Stone in 1967 [5] | Hawaiian Ethnobotany online database (Bishop Museum, 2023) [7] | The Hawaiian Islands website, National Museum of Natural History (NMNH) [6]                                       | All endemic Hawaiian plants [5–7]                     |
|-----|-------------------------------|----------------------------------------------------------------|-------------------------------------------------------------------------------------------------------------------|-------------------------------------------------------|
| 27  |                               | <i>Psychotria hawaiiensis</i>                                  | <i>Bidens wiebkei</i>                                                                                             | <i>Bidens populifolia</i>                             |
| 28  |                               | <i>Rauvolfia sandwicensis</i>                                  | <i>Charpentiera obovata</i>                                                                                       | <i>Bidens sandwicensis</i>                            |
| 29  |                               | <i>Santalum paniculatum</i>                                    | <i>Clermontia persicifolia</i>                                                                                    | <i>Bidens sandwicensis</i> subsp. <i>confusa</i>      |
| 30  |                               | <i>Sophora chrysophylla</i>                                    | <i>Coprosma ernodeides</i>                                                                                        | <i>Bidens sandwicensis</i> subsp. <i>sandwicensis</i> |
| 31  |                               | <i>Vaccinium calycinum</i>                                     | <i>Cuscuta sandwichiana</i>                                                                                       | <i>Bidens torta</i>                                   |
| 32  |                               | <i>Vaccinium reticulatum</i>                                   | <i>Dryopteris mauiensis</i>                                                                                       | <i>Bidens valida</i>                                  |
| 33  |                               | <i>Wikstroemia monticola</i>                                   | <i>Dubautia arborea</i>                                                                                           | <i>Bidens wiebkei</i>                                 |
| 34  |                               | <i>Wikstroemia uva-ursi</i>                                    | <i>Erythrina sandwicensis</i>                                                                                     | <i>Charpentiera obovata</i>                           |
| 35  |                               | <i>Zanthoxylum dipetalum</i>                                   | <i>Hesperomannia arborescens</i>                                                                                  | <i>Clermontia persicifolia</i>                        |
| 36  |                               | <i>Zanthoxylum hawaiiense</i>                                  | <i>Hillebrandia sandwicensis</i>                                                                                  | <i>Coprosma ernodeides</i>                            |
| 37  |                               | <i>Zanthoxylum kauaense</i>                                    | <i>Lobelia yuccoides</i>                                                                                          | <i>Cuscuta sandwichiana</i>                           |
| 38  |                               |                                                                | <i>Lysimachia daphnoides</i>                                                                                      | <i>Dryopteris mauiensis</i>                           |
| 39  |                               |                                                                | <i>Lysimachia filifolia</i>                                                                                       | <i>Dubautia arborea</i>                               |
| 40  |                               |                                                                | <i>Lysimachia glutinosa</i>                                                                                       | <i>Erythrina sandwicensis</i>                         |
| 41  |                               |                                                                | <i>Lysimachia hillebrandii</i>                                                                                    | <i>Gardenia brighamii</i>                             |
| 42  |                               |                                                                | <i>Lysimachia iniki</i>                                                                                           | <i>Hesperomannia arborescens</i>                      |
| 43  |                               |                                                                | <i>Lysimachia kalalauensis</i>                                                                                    | <i>Hillebrandia sandwicensis</i>                      |
| 44  |                               |                                                                | <i>Lysimachia maxima</i>                                                                                          | <i>Lobelia yuccoides</i>                              |
| 45  |                               |                                                                | <i>Lysimachia ovoidea</i>                                                                                         | <i>Lysimachia daphnoides</i>                          |
| 46  |                               |                                                                | <i>Lysimachia pendens</i>                                                                                         | <i>Lysimachia filifolia</i>                           |
| 47  |                               |                                                                | <i>Lysimachia remyi</i>                                                                                           | <i>Lysimachia glutinosa</i>                           |
| 48  |                               |                                                                | <i>Lysimachia scopulensis</i>                                                                                     | <i>Lysimachia hillebrandii</i>                        |
| 49  |                               |                                                                | <i>Lysimachia waianaeensis</i>                                                                                    | <i>Lysimachia iniki</i>                               |
| 50  |                               |                                                                | <i>Phyllanthus distichus</i>                                                                                      | <i>Lysimachia kalalauensis</i>                        |
| 51  |                               |                                                                | <i>Pipturus albidus</i>                                                                                           | <i>Lysimachia maxima</i>                              |
| 52  |                               |                                                                | <i>Platydesma campanulatum</i> , <i>P. spathulatum</i> , <i>P. campanulata</i> (syn. <i>Melicope spathulata</i> ) | <i>Lysimachia ovoidea</i>                             |
| 53  |                               |                                                                | <i>Rauvolfia sandwicensis</i>                                                                                     | <i>Lysimachia pendens</i>                             |
| 54  |                               |                                                                | <i>Sophora chrysophylla</i>                                                                                       | <i>Lysimachia remyi</i>                               |
| 55  |                               |                                                                | <i>Vaccinium calycinum</i>                                                                                        | <i>Lysimachia scopulensis</i>                         |
| 56  |                               |                                                                | <i>Vaccinium reticulatum</i>                                                                                      | <i>Lysimachia waianaeensis</i>                        |

| No. | Benjamin C. Stone in 1967 [5] | Hawaiian Ethnobotany online database (Bishop Museum, 2023) [7] | The Hawaiian Islands website, National Museum of Natural History (NMNH) [6] | All endemic Hawaiian plants [5–7]                                                                                 |
|-----|-------------------------------|----------------------------------------------------------------|-----------------------------------------------------------------------------|-------------------------------------------------------------------------------------------------------------------|
| 57  |                               |                                                                | <i>Wikstroemia monticola</i>                                                | <i>Melicope barbiger</i> a (syn. <i>Pelea barbiger</i> a)                                                         |
| 58  |                               |                                                                | <i>Wilkesia gymnoxiphium</i>                                                | <i>Phyllanthus distichus</i>                                                                                      |
| 59  |                               |                                                                | <i>Wilkesia hobdyi</i>                                                      | <i>Pipturus albidus</i>                                                                                           |
| 60  |                               |                                                                | <i>Zanthoxylum hawaiiense</i>                                               | <i>Platydesma campanulatum</i> , <i>P. spathulatum</i> , <i>P. campanulata</i> (syn. <i>Melicope spathulata</i> ) |
| 61  |                               |                                                                | <i>Zanthoxylum kauaense</i>                                                 | <i>Psychotria hawaiiensis</i>                                                                                     |
| 62  |                               |                                                                |                                                                             | <i>Rauvolfia sandwicensis</i>                                                                                     |
| 63  |                               |                                                                |                                                                             | <i>Santalum paniculatum</i>                                                                                       |
| 64  |                               |                                                                |                                                                             | <i>Sophora chrysophylla</i>                                                                                       |
| 65  |                               |                                                                |                                                                             | <i>Vaccinium calycinum</i>                                                                                        |
| 66  |                               |                                                                |                                                                             | <i>Vaccinium reticulatum</i>                                                                                      |
| 67  |                               |                                                                |                                                                             | <i>Wikstroemia monticola</i>                                                                                      |
| 68  |                               |                                                                |                                                                             | <i>Wikstroemia uva-ursi</i>                                                                                       |
| 69  |                               |                                                                |                                                                             | <i>Wilkesia gymnoxiphium</i>                                                                                      |
| 70  |                               |                                                                |                                                                             | <i>Wilkesia hobdyi</i>                                                                                            |
| 71  |                               |                                                                |                                                                             | <i>Zanthoxylum dipetalum</i>                                                                                      |
| 72  |                               |                                                                |                                                                             | <i>Zanthoxylum hawaiiense</i>                                                                                     |
| 73  |                               |                                                                |                                                                             | <i>Zanthoxylum kauaense</i>                                                                                       |

**Table S2.** Phytochemistry and biological studies of the endemic Hawaiian plants.

| No. | Plant                                                       | Parts used             | Chemical components        | Biological activity | Reference |
|-----|-------------------------------------------------------------|------------------------|----------------------------|---------------------|-----------|
| 1   | <i>Argemone glauca</i> var. <i>glauca</i>                   | NA                     | Alkaloids                  | NA                  | [9]       |
| 2   | <i>Bidens</i> genus                                         |                        |                            |                     |           |
|     | 2.1 <i>Bidens amplexens</i>                                 | Leaves, roots, flowers | Polyacetylenes, flavonoids | NA                  | [12,13]   |
|     | 2.2 <i>Bidens asymmetrica</i>                               | Leaves, roots, flowers | Polyacetylenes, flavonoids | NA                  | [12,13]   |
|     | 2.3 <i>Bidens campylotheca</i> subsp. <i>campylotheca</i>   | Leaves, roots, flowers | Polyacetylenes, flavonoids | NA                  | [12,13]   |
|     | 2.4 <i>Bidens campylotheca</i> subsp. <i>pentamera</i>      | Leaves, roots, flowers | Polyacetylenes, flavonoids | NA                  | [12,13]   |
|     | 2.5 <i>Bidens campylotheca</i> subsp. <i>waihoiensis</i>    | Leaves and flowers     | Flavonoids                 | NA                  | [13]      |
|     | 2.6 <i>Bidens cervicata</i>                                 | Leaves, roots, flowers | Polyacetylenes, flavonoids | NA                  | [12,13]   |
|     | 2.7 <i>Bidens conjuncta</i>                                 | Leaves, roots, flowers | Polyacetylenes, flavonoids | NA                  | [12,13]   |
|     | 2.8 <i>Bidens cosmoides</i>                                 | Leaves, roots, flowers | Polyacetylenes, flavonoids | NA                  | [12,13]   |
|     | 2.9 <i>Bidens forbesii</i> subsp. <i>forbesii</i>           | Leaves, roots, flowers | Polyacetylenes, flavonoids | NA                  | [12,13]   |
|     | 2.10 <i>Bidens forbesii</i> subsp. <i>kahiliensis</i>       | Leaves, roots, flowers | Polyacetylenes, flavonoids | NA                  | [12,13]   |
|     | 2.11 <i>Bidens hawaiiensis</i>                              | Leaves, roots, flowers | Polyacetylenes, flavonoids | NA                  | [12,13]   |
|     | 2.12 <i>Bidens hillebrandiana</i>                           | Leaves and flowers     | Flavonoids                 | NA                  | [13]      |
|     | 2.13 <i>Bidens hillebrandiana</i> subsp. <i>polycephala</i> | Leaves and flowers     | Flavonoids                 | NA                  | [13]      |
|     | 2.14 <i>Bidens macrocarpa</i>                               | Leaves, roots, flowers | Polyacetylenes, flavonoids | NA                  | [12,13]   |
|     | 2.15 <i>Bidens mauiensis</i>                                | Leaves, roots, flowers | Polyacetylenes, flavonoids | NA                  | [12,13]   |
|     | 2.16 <i>Bidens menziesii</i> subsp. <i>filiformis</i>       | Leaves, roots, flowers | Polyacetylenes, flavonoids | NA                  | [12,13]   |
|     | 2.17 <i>Bidens menziesii</i> subsp. <i>menziesii</i>        | Leaves, roots, flowers | Polyacetylenes, flavonoids | NA                  | [12,13]   |
|     | 2.18 <i>Bidens micrantha</i> subsp. <i>ctenophylla</i>      | Leaves, roots, flowers | Polyacetylenes, flavonoids | NA                  | [12,13]   |
|     | 2.19 <i>Bidens micrantha</i> subsp. <i>kalealaha</i>        | Leaves, roots, flowers | Polyacetylenes, flavonoids | NA                  | [12,13]   |
|     | 2.20 <i>Bidens micrantha</i> subsp. <i>micrantha</i>        | Leaves, roots, flowers | Polyacetylenes, flavonoids | NA                  | [12,13]   |
|     | 2.21 <i>Bidens molokaiensis</i>                             | Leaves, roots, flowers | Polyacetylenes, flavonoids | NA                  | [12,13]   |
|     | 2.22 <i>Bidens populifolia</i>                              | Leaves, roots, flowers | Polyacetylenes, flavonoids | NA                  | [12,13]   |

| No. | Plant                                                      | Parts used               | Chemical components             | Biological activity                                                    | Reference |
|-----|------------------------------------------------------------|--------------------------|---------------------------------|------------------------------------------------------------------------|-----------|
|     | 2.23 <i>Bidens sandvicensis</i> subsp. <i>confusa</i>      | Leaves, roots, flowers   | Polyacetylenes, flavonoids      | NA                                                                     | [12,13]   |
|     | 2.24 <i>Bidens sandvicensis</i> subsp. <i>sandvicensis</i> | Leaves, roots, flowers   | Polyacetylenes, flavonoids      | NA                                                                     | [12,13]   |
|     | 2.25 <i>Bidens torta</i>                                   | Leaves, roots, flowers   | Polyacetylenes, flavonoids      | NA                                                                     | [12,13]   |
|     | 2.26 <i>Bidens valida</i>                                  | Leaves, roots, flowers   | Polyacetylenes, flavonoids      | NA                                                                     | [12,13]   |
|     | 2.27 <i>Bidens wiebkei</i>                                 | Leaves, roots, flowers   | Polyacetylenes, flavonoids      | NA                                                                     | [12,13]   |
| 3   | <i>Charpentiera obovata</i>                                | Roots, barks             | Alkaloids                       | NA                                                                     | [14,15]   |
| 4   | <i>Clermontia persicifolia</i>                             | Leaves                   | Flavonoids                      | NA                                                                     | [18]      |
| 5   | <i>Coprosma ernodeoides</i>                                | Leaves, berries          | Iridoid glycosides              | Antioxidant properties                                                 | [19]      |
| 6   | <i>Cuscuta sandwichiana</i>                                | NA                       | Macrocyclic glycoresins         | Cytotoxicity                                                           | [21]      |
|     |                                                            | Stems                    | NA                              | Antiviral activity against human immunodeficiency Virus Type-1 (HIV-1) | [25]      |
| 7   | <i>Dryopteris mauiensis</i>                                | NA                       | Phenolics                       | NA                                                                     | [28]      |
| 8   | <i>Dubautia arborea</i>                                    | Leaves                   | Flavonoids                      | NA                                                                     | [29]      |
| 9   | <i>Erythrina sandwicensis</i>                              | Seeds                    | Alkaloids                       | NA                                                                     | [33–35]   |
|     |                                                            | Fungus-inoculated leaves | Pterocarpanes                   | NA                                                                     | [36]      |
| 10  | <i>Gardenia brighamii</i>                                  | Leaves                   | NA                              | Antifungal activity against <i>Fusarium</i> species                    | [39]      |
| 11  | <i>Hesperomannia arborescens</i>                           | Leaves                   | Flavonols, flavonoid glucosides | NA                                                                     | [41]      |
| 12  | <i>Hillebrandia sandwicensis</i>                           | Leaves                   | C-glycosyl flavones             | NA                                                                     | [42]      |
| 13  | <i>Lobelia yuccoides</i>                                   | Roots, stem barks        | Alkaloids                       | NA                                                                     | [43]      |
| 14  | <i>Lysimachia</i> genus                                    |                          |                                 |                                                                        |           |
|     | 14.1 <i>Lysimachia daphnoides</i>                          | Arial part               | Flavonol glycosides             | NA                                                                     | [45]      |
|     | 14.2 <i>Lysimachia filifolia</i>                           | Arial part               | Flavonol glycosides             | NA                                                                     | [45]      |
|     | 14.3 <i>Lysimachia glutinosa</i>                           | Arial part               | Flavonol glycosides             | NA                                                                     | [45]      |
|     | 14.4 <i>Lysimachia hillebrandii</i>                        | Arial part               | Flavonol glycosides             | NA                                                                     | [45]      |
|     | 14.5 <i>Lysimachia iniki</i>                               | Arial part               | Flavonol glycosides             | NA                                                                     | [45]      |
|     | 14.6 <i>Lysimachia kalalauensis</i>                        | Arial part               | Flavonol glycosides             | NA                                                                     | [45]      |
|     | 14.7 <i>Lysimachia maxima</i>                              | Arial part               | Flavonol glycosides             | NA                                                                     | [45]      |
|     | 14.8 <i>Lysimachia ovoidea</i>                             | Arial part               | Flavonol glycosides             | NA                                                                     | [45]      |

| No. | Plant                                                                                                               | Parts used                | Chemical components                                                                                                  | Biological activity                                                                                                                                                                      | Reference |
|-----|---------------------------------------------------------------------------------------------------------------------|---------------------------|----------------------------------------------------------------------------------------------------------------------|------------------------------------------------------------------------------------------------------------------------------------------------------------------------------------------|-----------|
|     | 14.9 <i>Lysimachia pendens</i>                                                                                      | Arial part                | Flavonol glycosides                                                                                                  | NA                                                                                                                                                                                       | [45]      |
|     | 14.10 <i>Lysimachia remyi</i>                                                                                       | Arial part                | Flavonol glycosides                                                                                                  | NA                                                                                                                                                                                       | [45]      |
|     | 14.11 <i>Lysimachia scopulensis</i>                                                                                 | Arial part                | Flavonol glycosides                                                                                                  | NA                                                                                                                                                                                       | [45]      |
|     | 14.12 <i>Lysimachia waianaeensis</i>                                                                                | Arial part                | Flavonol glycosides                                                                                                  | NA                                                                                                                                                                                       | [45]      |
| 15  | <i>Melicope barbigera</i> (syn. <i>Pelea barbigera</i> )                                                            | Leaves                    | Acetophenones, 2H-benzopyranes, isomeric melifoliones                                                                | Cytotoxic activities against the A2780 human ovarian cancer cell line                                                                                                                    | [48]      |
| 16  | <i>Phyllanthus distichus</i>                                                                                        | Fruits                    | NA                                                                                                                   | Antimicrobial activity                                                                                                                                                                   | [51]      |
|     |                                                                                                                     | Fruits                    | Alkaloids, glycosides, phenolic compounds, reducing sugars, saponins, polyphenols, tannins, flavonoids, and terpenes | Antibacterial activity and antioxidant activities                                                                                                                                        | [52]      |
|     |                                                                                                                     | Leaves                    | NA                                                                                                                   | Hypoglycemic and antidiabetic properties                                                                                                                                                 | [53]      |
| 17  | <i>Pipturus albidus</i>                                                                                             | Leaves                    | NA                                                                                                                   | Anti-microbial activity, anti-bacterial activity, and anti-fungal properties                                                                                                             | [25]      |
|     |                                                                                                                     | Leaves, bark, stems       | NA                                                                                                                   | Antiviral activity                                                                                                                                                                       | [57]      |
|     |                                                                                                                     | Leaves                    | Macronutrients and minerals<br>Phenolic acids                                                                        | Antioxidant Activity                                                                                                                                                                     | [54,61]   |
|     |                                                                                                                     | Leaves                    | NA                                                                                                                   | Total antioxidant capacity                                                                                                                                                               | [61]      |
|     |                                                                                                                     | Leaves                    | NA                                                                                                                   | Antioxidant, anticancer, and chemo preventive properties                                                                                                                                 | [62]      |
|     |                                                                                                                     | Leaves, bark, stems       | Polyphenolics                                                                                                        | Anti-viral, anti-fungal, anti-microbial, and anti-inflammatory attributes                                                                                                                | [57]      |
|     |                                                                                                                     | Leaves                    | NA                                                                                                                   | Antibacterial, antiviral properties, antioxidant effects, mild natural laxative properties, anti-allergic effects, promoting cardiovascular and liver health, and reducing stress levels | [58]      |
| 18  | <i>Platydesma spathulatum</i> or <i>P. campanulatum</i> or <i>P. campanulata</i> (syn. <i>Melicope spathulata</i> ) | Roots, stem barks, leaves | Alkaloids, furoquinolines                                                                                            | NA                                                                                                                                                                                       | [64]      |
| 19  | <i>Psychotria hawaiiensis</i>                                                                                       | Barks, leaves             | NA                                                                                                                   | Anti-viral against Herpes Simplex Virus 1 and 2A, anti-fungal, and anti-bacterial activities                                                                                             | [54]      |

| No. | Plant                             | Parts used           | Chemical components                   | Biological activity                                                             | Reference |
|-----|-----------------------------------|----------------------|---------------------------------------|---------------------------------------------------------------------------------|-----------|
|     |                                   | Barks, leaves        | NA                                    | Antiviral activity against human immunodeficiency virus type-1 (HIV-1)          | [25]      |
| 20  | <i>Rauvolfia sandwicensis</i>     | Roots                | Alkaloids                             | NA                                                                              | [68,69]   |
| 21  | <i>Santalum paniculatum</i>       | Woods                | Essential oils (terpenoids)           | NA                                                                              | [72]      |
|     |                                   | Leaves               | NA                                    | Antimicrobial activity against <i>Staphylococcus aureus</i>                     | [73]      |
|     |                                   | NA                   | Essential oils (terpenoids)           | NA                                                                              | [74]      |
|     |                                   | NA                   | Essential oils (terpenoids)           | Potential bioactivity against <i>Tribolium castaneum</i> (red flour beetle)     | [75]      |
| 22  | <i>Sophora chrysophylla</i>       | Barks                | Quinolizidine alkaloids               | NA                                                                              | [76]      |
|     |                                   | Leaves, stems, seeds | Lupin alkaloids                       | NA                                                                              | [77]      |
|     |                                   | Roots                | Isoflavones and 6a-hydroxypterocarpan | NA                                                                              | [78]      |
| 23  | <i>Vaccinium</i> genus            |                      |                                       |                                                                                 |           |
|     | 23.1 <i>Vaccinium calycinum</i>   | Leaves               | Flavonoid glycosides, cinnamic ester  | NA                                                                              | [81]      |
|     |                                   | Fruits               | NA                                    | Antioxidant activity                                                            | [82]      |
|     |                                   | Fruits               | NA                                    | Antimicrobial activity against <i>Listeria monocytogenes</i>                    | [83]      |
|     |                                   | Fruits               | Phenolics and anthocyanins            | Antimicrobial activity against <i>Listeria monocytogenes</i> and <i>E. coli</i> | [84]      |
|     | 23.2 <i>Vaccinium reticulatum</i> | Leaves               | Flavonoid glycosides, cinnamic ester  | NA                                                                              | [81]      |
|     |                                   | Fruits               | NA                                    | Antioxidant activity                                                            | [82]      |
| 24  | <i>Wikstroemia</i> genus          |                      |                                       |                                                                                 |           |
|     | 24.1 <i>Wikstroemia monticola</i> | Woody stems, barks   | Daphnane diterpenes                   | Antitumor activity                                                              | [86–88]   |
|     | 24.2 <i>Wikstroemia uva-ursi</i>  | Whole plants         | Lignans                               | Antitumor activity against the P-388 lymphocytic leukemia (3PS)                 | [86,94]   |
| 25  | <i>Wilkesia</i> genus             |                      |                                       |                                                                                 |           |
|     | 25.1 <i>Wilkesia gymnoxiphium</i> | Leaves               | Flavonoids (minor quantitative)       | NA                                                                              | [99]      |
|     | 25.2 <i>Wilkesia hobdyi</i>       | Leaves               | Flavonoids (minor quantitative)       | NA                                                                              | [99]      |
| 26  | <i>Zanthoxylum</i> genus          |                      |                                       |                                                                                 |           |



| No.  | Plant                         | Parts used             | Chemical components                                   | Biological activity                         | Reference |
|------|-------------------------------|------------------------|-------------------------------------------------------|---------------------------------------------|-----------|
| 26.1 | <i>Zanthoxylum dipetalum</i>  | Root barks, root woods | Alkaloids, pyranocoumarins, triterpene, and flavonoid | NA                                          | [101]     |
|      |                               | Root barks             | Pyranocoumarin and dipyrancoumarin                    | NA                                          | [102]     |
|      |                               | Leaves                 | Acyl histamines and protopine-type alkaloid           | NA                                          | [103]     |
|      |                               | Leaves, pericarps      | Volatile compounds                                    | Insecticidal activity (ovicidal properties) | [105,106] |
| 26.2 | <i>Zanthoxylum hawaiiense</i> | Leaves, pericarps      | Volatile compounds                                    | Insecticidal activity (ovicidal properties) | [105,106] |
| 26.3 | <i>Zanthoxylum kauaense</i>   | Leaves, pericarps      | Volatile compounds                                    | Insecticidal activity (ovicidal properties) | [105,106] |

NA= Not available
